# Supplementary material
Source: MDPI journal article supplement (https://www.mdpi.com/2076-3417/11/23/11290)
Supplement: s1 [file s1]

# Supplementary Materials: Reduced Graphene Oxide-Metalloporphyrin Sensors for Human Breath Screening

Bo Mi Lee <sup>1,2,\*</sup>, Ameen Eetemadi <sup>1,2</sup> and Ilias Tagkopoulos <sup>1,2</sup>

**Figure S1:** Dimensions of the interdigitated electrode

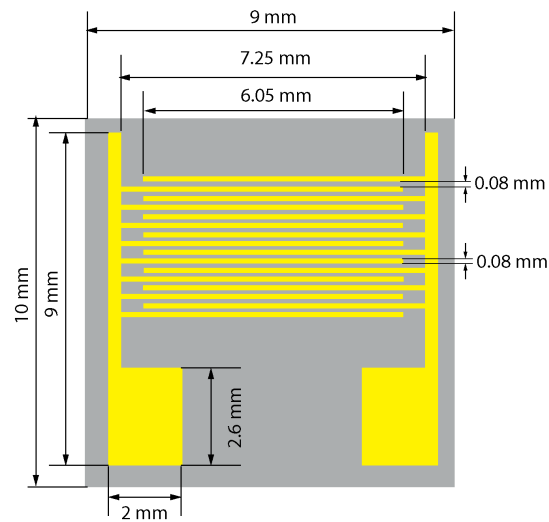

**Table S1:** PCA weights

|                           | PC1    | PC2     | PC3     |
|---------------------------|--------|---------|---------|
| R <sub>norm</sub> (MnTPP) | 0.3658 | 0.0625  | 0.0292  |
| R <sub>norm</sub> (ZnTPP) | 0.3616 | -0.2565 | 0.3614  |
| R <sub>norm</sub> (FeTPP) | 0.3448 | 0.4887  | -0.0246 |
| R <sub>norm</sub> (CoTPP) | 0.3433 | -0.4938 | -0.2439 |
| Area (MnTPP)              | 0.3633 | 0.2234  | -0.2394 |
| Area (ZnTPP)              | 0.3545 | -0.1787 | 0.6808  |
| Area (FeTPP)              | 0.3445 | 0.4998  | -0.0483 |
| Area (CoTPP)              | 0.3499 | -0.3404 | -0.5341 |

**Figure S2:** F1-score results of bootstrapped samples for (a) acetone, (b) isopropanol, (c) ammonia, and (d) carbon monoxide classification

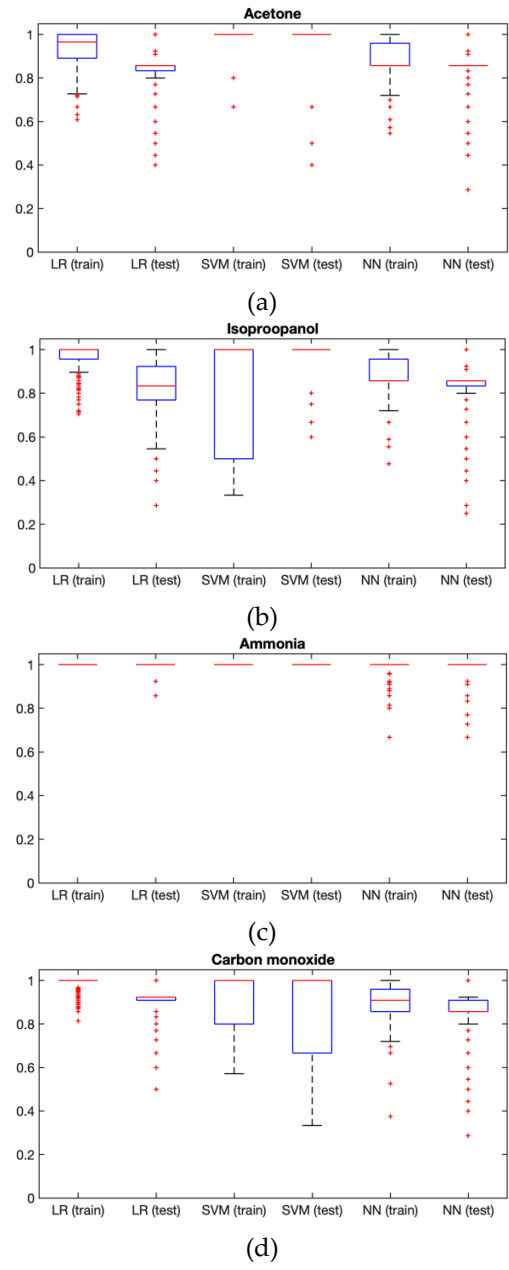

**Table S2:**  $R_{\text{norm}}$  [%] of four different RGO-metalloporphyrin films at different ammonia concentrations

| Ammonia concentration [ppm] | MnTPP     | ZnTPP    | FeTPP   | CoTPP    |
|-----------------------------|-----------|----------|---------|----------|
| 0                           | 0.000294  | 0.00993  | 0.00809 | 0.0172   |
| 0                           | 0.00197   | 0.00257  | 0.00384 | 0.000598 |
| 0                           | -0.000681 | 0.00538  | 0.0148  | 0.0175   |
| 0                           | 0.00807   | 0.00472  | 0.0102  | 0.00726  |
| 0                           | 0.0124    | 0.000461 | 0.00653 | 0.00292  |
| 0                           | 0.0188    | 0.00599  | 0.00383 | 0.00362  |
| 1                           | 0.0568    | 0.0399   | 0.102   | 0.137    |
| 1                           | 0.128     | 0.0647   | 0.155   | 0.0770   |
| 1                           | 0.129     | 0.0479   | 0.153   | 0.119    |
| 5                           | 0.244     | 0.268    | 0.372   | 0.235    |
| 5                           | 0.331     | 0.233    | 0.635   | 0.205    |
| 5                           | 0.273     | 0.242    | 0.535   | 0.124    |
| 5                           | 0.419     | 0.403    | 0.506   | 0.306    |
| 5                           | 0.314     | 0.413    | 0.272   | 0.364    |
| 5                           | 0.305     | 0.350    | 0.464   | 0.214    |
| 10                          | 0.509     | 0.666    | 0.806   | 0.416    |
| 10                          | 0.516     | 0.653    | 0.767   | 0.305    |
| 10                          | 0.385     | 0.488    | 0.670   | 0.306    |
